# Supplementary material for: Somatic neurofibromatosis type 1 (NF1) inactivation characterizes NF1-associated pilocytic astrocytoma
Source: HighWire-hosted journal article supplement (doi:10.1101/gr.142604.112), 2012-12-05
Supplement: Supplemental_Data.docx [file Supplemental_Data.docx]

**Supplementary Information for Somatic Neurofibromatosis Type 1 (NF1) Inactivation**

**Characterizes NF1-associated Pilocytic Astrocytoma**

David H. Gutmann1,2*,Michael D. McLellan3,4, Ibrahim Hussain1, John W. Wallis3,4, Lucinda L. Fulton3,4, Robert S. Fulton3,4, Vincent Magrini3,4, Ryan Demeter3,4, Todd Wylie3,4, Cyriac Kandoth3,4, Jeffrey R. Leonard5, Abhijit Guha6, Christopher A. Miller3,4, Li Ding3,4, Elaine R. Mardis2,3,4*

1Department of Neurology, Washington University School of Medicine, St. Louis MO

2Alvin J. Siteman Cancer Center, Washington University School of Medicine, St. Louis MO

3The Genome Institute at Washington University School of Medicine, St. Louis MO

4Department of Genetics, Washington University School of Medicine, St. Louis MO

5Division of Neurosurgery, Washington University School of Medicine, St. Louis MO

6Department of Neurosurgery, University of Toronto, Labatt Brain Tumor Centre, Toronto CANADA

* **Corresponding authors**: David H. Gutmann, MD, PhD, Department of Neurology, Box 8111, 660 South Euclid Avenue, St. Louis MO 63110; 314-362-7379 (Phone), [gutmannd@neuro.wustl.edu](mailto:gutmannd@neuro.wustl.edu) (Email) and Elaine R. Mardis, PhD, Genome Institute at Washington University, St. Louis MO 63110; 314-286-1805 (Phone), [emardis@wustl.edu](mailto:emardis@wustl.edu) (Email).

**Table of Contents**

A. Supplementary Figures (p. 3)

B. Supplementary Figure Legends (p. 4)

C. Supplementary Tables (pp. 5-19)

**A. Supplementary Figures**

**Supplementary Figure 1**.

**T01**

**T03**

**T02**


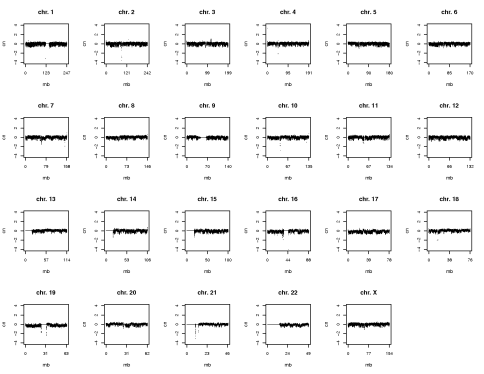

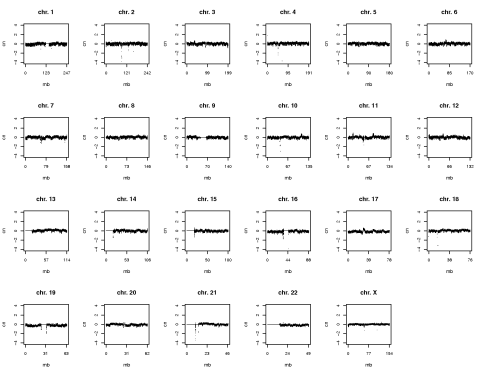

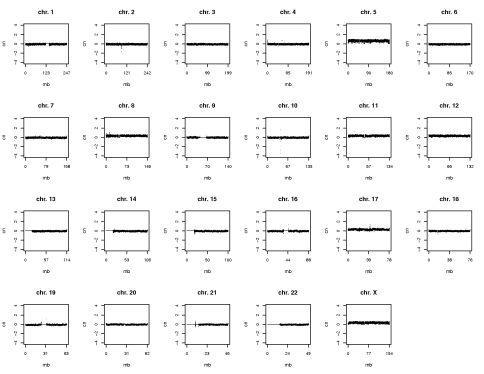


**B. Supplementary Figure Legends**

**Supplementary Figure 1**. Genome-wide copy number alterations detected in three whole-genome sequenced NF1-PA tumors.

**C. Supplementary Tables**

**Supplementary Table 1.** Coverage metrics and array-based SNP concordance for three whole-genome-sequenced cases.

**Supplementary Table 2.** Genome-wide methylation analysis.

| **Chr** | **Position(GRCh37)** | **Genes (10kb Flank)** | **T01**  **(M Value)** | **T02**  **(M Value)** | **T03**  **(M Value)** | **S9883**  **(M Value)** | **S11832**  **(M Value)** |
| --- | --- | --- | --- | --- | --- | --- | --- |
| 1 | 6515624 | *ESPN,TNFRSF25* | 0.155616359 | -3.785688936 | -4.346728495 | -3.581966705 | -3.022991076 |
| 1 | 12610104 |  | 3.203006897 | 0.325771973 | 0.908959325 | 2.58373598 | 0.317732389 |
| 1 | 45254530 | *BEST4,RNU1-5,RNU5D* | 2.861062243 | 0.516626414 | 0.853154937 | 0.157332529 | 2.026514519 |
| 1 | 149149465 | *RNU1-5* | 3.033037186 | 0.293218603 | 0.81741265 | 0.365188611 | 0.891320411 |
| 1 | 149155775 | *RNU1-5* | 0.779340546 | -1.055992544 | -1.806350842 | -1.922664542 | -1.436709292 |
| 1 | 170637796 | *PRRX1* | 0.007381498 | -2.239852991 | -2.148794159 | -2.783198156 | 0.246721847 |
| 1 | 246172285 | *SMYD3* | 3.735579559 | 2.105361873 | 0.954133447 | 3.313304188 | 3.242813835 |
| 2 | 1587102 |  | 3.929128455 | 1.299526003 | 1.063681114 | 1.081378448 | 0.994387161 |
| 2 | 2893377 |  | 3.485407616 | 1.10534937 | 0.55079878 | 3.743284921 | 1.427035897 |
| 2 | 2893609 |  | 3.520720886 | 1.290010458 | 1.156371414 | 2.562497366 | 0.724079509 |
| 2 | 2893732 |  | 3.552501231 | 1.454606778 | 1.025304746 | 3.58312043 | 1.731982187 |
| 2 | 66810606 |  | 0.416399099 | -3.201735356 | -2.931331455 | 1.730979626 | -1.106634154 |
| 2 | 106227134 |  | 3.314776191 | 0.833797274 | 1.261750951 | 1.328598936 | 0.725074891 |
| 2 | 119591144 | *EN1* | 0.301336686 | -3.949526946 | -3.816329565 | -2.973027207 | -3.750140703 |
| 2 | 119609592 | *EN1* | 1.184481202 | -1.696402422 | -1.463222091 | -1.414828519 | -0.939316964 |
| 2 | 119616825 |  | 0.250525707 | -1.832876893 | -2.670054438 | -1.604764909 | -0.805869931 |
| 2 | 177012191 | *HOXD3,MIR10B,HOXD4* | 0.775972871 | -1.276025639 | -1.555360334 | -1.628004442 | -1.948373359 |
| 2 | 177014966 | *HOXD3,MIR10B,HOXD4* | 1.226248608 | -1.177850912 | -1.057106203 | -1.383108803 | -1.606099807 |
| 2 | 223166435 | *CCDC140,PAX3* | 0.199054843 | -1.693613604 | -2.421741675 | 0.603166632 | -1.802070867 |
| 2 | 223166909 | *CCDC140,PAX3* | 0.183084991 | -1.68159553 | -2.143335221 | 1.638453907 | -2.31024934 |
| 2 | 223167617 | *CCDC140,PAX3* | 0.281508544 | -2.372791341 | -2.157541277 | 1.796927801 | -2.196090249 |
| 2 | 237081839 | *GBX2* | 0.59591125 | -1.376871494 | -1.753428379 | -1.908800186 | -0.162901086 |
| 3 | 56810151 | *ARHGEF3* | 0.476313231 | -1.848458912 | -1.27546105 | 0.972105418 | -0.936965631 |
| 3 | 73045556 | *PPP4R2,GLT8D4* | 1.969821893 | -0.405850275 | 0.186958434 | 0.777043217 | 1.92187183 |
| 3 | 123813454 | *KALRN* | 3.964519613 | 0.196866967 | 1.284661199 | 1.840466864 | 2.765046402 |
| 3 | 123813465 | *KALRN* | 3.361207822 | -0.486594608 | 0.744971018 | 0.952670955 | 2.009507897 |
| 3 | 123813587 | *KALRN* | 3.666654248 | 0.869344286 | 2.306069675 | 2.916429885 | 3.116917752 |
| 4 | 124342 | *MAFIP,ZNF718* | 0.428142487 | -3.464878238 | -1.996658278 | -3.178616496 | -1.879893315 |
| 4 | 3897762 | *OR4D12P,OR7E84P* | 4.582972119 | 2.879980854 | 2.177342988 | 4.423652866 | 3.072580611 |
| 4 | 7283005 | *SORCS2* | 3.936544518 | 0.859535889 | 1.485801888 | 1.684724547 | 2.373912087 |
| 4 | 41883107 |  | 0.006541947 | -2.693923068 | -2.376423468 | -0.463706274 | -2.404565244 |
| 4 | 79971235 | *TARM1* | 3.416954702 | 0.3209525 | 0.887979617 | 1.927544267 | 0.385732909 |
| 4 | 79971408 | *TARM1* | 3.388417612 | 0.22773778 | 0.876126096 | 0.058437959 | 0.344248551 |
| 5 | 958837 |  | 2.807592253 | 0.32216713 | 0.213133966 | 2.655924696 | 0.381709742 |
| 5 | 140603270 | *PCDHB13,PCDHB14,C16orf13* | 1.470389568 | -0.851063077 | -0.386848916 | -0.884610606 | -0.16858626 |
| 5 | 179741120 | *GFPT2* | 3.331716873 | 0.261372665 | 0.554813901 | 0.624323416 | 0.424223899 |
| 6 | 901081 |  | 3.499381696 | 0.870059687 | 1.676806612 | 3.383704292 | 3.623795967 |
| 6 | 7142066 | *RREB1* | 4.187999788 | 1.883797195 | 2.10050918 | -0.039462991 | 1.372302193 |
| 6 | 31096204 | *PSORS1C1,CDSN,PSORS1C2* | 0.47645491 | -2.099076728 | -1.804160998 | -1.913705724 | -1.298045465 |
| 6 | 31237029 | *HLA-C,USP8P* | 0.224412705 | -1.364016681 | -4.984936459 | -2.051752314 | 0.251434538 |
| 6 | 31237034 | *HLA-C,USP8P* | 1.21496883 | -2.301684008 | -1.111381717 | -2.776925812 | 2.70142587 |
| 6 | 31237722 | *HLA-C,USP8P* | 0.158591911 | -2.504213159 | -1.931150246 | -1.484031398 | 0.309150689 |
| 6 | 31275881 |  | 0.23570455 | -2.923025174 | -1.072242506 | -0.291162607 | -3.157823989 |
| 6 | 32632715 | *HLA-DQB1* | 0.080919995 | -4.575654336 | 0.647199633 | 0.172714975 | -0.241305195 |
| 6 | 33282896 | *TAPBP,ZBTB22,DAXX* | 0.460695395 | -3.190799473 | -1.565359951 | 0.443160597 | -0.893789645 |
| 6 | 33288332 | *TAPBP,ZBTB22,DAXX* | 4.043580898 | -0.503466568 | 0.996771451 | 0.05999916 | -0.005893807 |
| 6 | 100060917 | *PRDM13* | 0.255134344 | -1.71145103 | -1.912182121 | -1.393225864 | -1.877092048 |
| 6 | 164345307 |  | 2.793478704 | -0.043758354 | 0.894236648 | 0.580008526 | 1.466817552 |
| 7 | 1293629 |  | 3.42903432 | 0.544171835 | 0.583981631 | 2.656040048 | 2.639720164 |
| 7 | 25100393 |  | 3.188248064 | 0.814613953 | 1.075536103 | 1.724970976 | 1.497716962 |
| 7 | 25100428 |  | 2.706733393 | 0.583790816 | 0.482815112 | 0.554531863 | 0.853648089 |
| 7 | 27159889 | *HOXA3,HOXA4* | 2.77598145 | -0.279720036 | 1.211759175 | -0.069183565 | 0.542159535 |
| 7 | 27162294 | *HOXA3,HOXA4* | 3.882060014 | 1.083781912 | 0.377192828 | -0.889809672 | -0.62498513 |
| 7 | 27163331 | *HOXA3,HOXA4* | 3.055374026 | 1.10244261 | 0.596775026 | -0.523616737 | -0.057248043 |
| 7 | 27168780 | *HOXA3,HOXA4* | 1.60850525 | -0.648756183 | -0.361990022 | -0.946019268 | -0.75272927 |
| 7 | 27168962 | *HOXA3,HOXA4* | 3.397047575 | 1.021600001 | 1.483368937 | -0.225215433 | 0.191102913 |
| 7 | 27169136 | *HOXA3,HOXA4* | 2.890148927 | 0.141675706 | 0.73429025 | -0.509533814 | -0.298677803 |
| 8 | 600233 |  | 5.515965979 | 0.98834288 | 1.990948884 | 5.6018479 | 5.228389379 |
| 8 | 1312875 |  | 3.667820035 | 0.731909415 | 1.501534652 | 1.349911121 | 1.068961173 |
| 8 | 6633067 |  | 5.652951651 | 6.061033209 | 0.228662176 | 5.331550774 | 3.342979885 |
| 8 | 72470352 |  | 0.191950758 | -2.171055817 | -3.16221096 | -1.878300891 | -1.416125563 |
| 8 | 144359074 | *GLI4* | 1.04228862 | -1.14169876 | -1.041784323 | 0.044558538 | 0.23012052 |
| 9 | 126135998 | *CRB2,DENND1A* | 0.323988184 | -5.167635275 | -3.895321544 | 0.647038069 | 0.418356222 |
| 10 | 1209463 | *NCRNA00200,TIMM23B* | 4.530159484 | 2.032505658 | 1.741764839 | 2.299114474 | 4.476718092 |
| 10 | 1939663 | *TIMM23B* | 2.676354803 | 0.019543966 | 0.261754384 | 3.197395505 | 0.487454836 |
| 10 | 1939683 | *TIMM23B* | 2.867394657 | 0.371587119 | 0.829797512 | 3.031213549 | 0.511559961 |
| 10 | 16741548 | *TIMM23B,RSU1,SRP9L1* | 4.051071631 | 1.597396733 | 1.001844486 | 0.642651697 | 1.634942658 |
| 10 | 72820053 | *SRP9L1* | 5.192136416 | 0.681892492 | 0.327413864 | 1.500609575 | 0.406993999 |
| 10 | 131669461 | *EBF3* | 1.377494464 | -1.297253161 | -0.999621091 | -1.454879501 | -0.348858349 |
| 10 | 134720534 | *C10orf92* | 2.913247706 | 0.429528887 | 0.967229094 | 0.959243511 | 0.385350818 |
| 11 | 1036754 | *MUC6* | 2.59893829 | 0.842563021 | -0.065868919 | 1.308357346 | 0.908457323 |
| 11 | 5959945 | *OR56A3,TRIM5* | 3.15769163 | 1.5604621 | 0.193684869 | 5.552620937 | 5.416792224 |
| 11 | 60738032 | *CD6* | 0.233715808 | -1.871257974 | -2.248780422 | -1.86730766 | -0.31495307 |
| 11 | 65415260 | *RELA,SIPA1* | 2.999010429 | 0.922971624 | 0.674858209 | 3.015116996 | 2.373314087 |
| 11 | 65425948 | *RELA,SIPA1* | 2.626585286 | 1.195899637 | -0.037456819 | 0.91277907 | 0.315013571 |
| 11 | 94883350 |  | 1.581959403 | -0.62637989 | -0.408561287 | 1.758951981 | 0.277205792 |
| 11 | 121665641 |  | 5.137459335 | 2.978176699 | 0.54311701 | 0.059214353 | 0.908766639 |
| 11 | 126456052 | *KIRREL3* | 0.645974019 | -0.620824548 | -2.2926635 | 1.869255514 | -2.641942213 |
| 12 | 11700489 |  | 4.55544341 | 1.018351468 | 1.100090124 | 4.300121494 | 4.480815705 |
| 12 | 106533863 | *NUAK1* | 0.246377689 | -2.452276266 | -2.081983861 | -2.049495618 | -2.267713531 |
| 12 | 117042895 |  | 3.680574412 | 1.282196351 | 0.54075066 | 1.217403712 | 0.035103801 |
| 12 | 117042917 |  | 3.37904249 | 0.998820686 | -0.326264405 | -0.209002609 | -1.670260707 |
| 12 | 122631519 | *MLXIP* | 5.532274088 | 1.663726184 | 5.010535144 | 5.022695059 | 5.028395395 |
| 12 | 132862057 | *GALNT9* | 2.082224062 | -0.050346755 | -0.050463484 | 0.139692267 | 1.807403713 |
| 13 | 76092766 | *COMMD6* | 4.97452393 | 4.861962938 | 0.494961044 | 4.735873297 | 4.296120984 |
| 13 | 112630712 |  | 3.436946026 | 2.299591203 | -0.369551599 | 0.005195786 | 1.331464729 |
| 13 | 114138225 | *DCUN1D2,TMCO3* | 3.424480746 | 0.448145811 | 0.802502094 | 2.504097322 | 3.101015941 |
| 14 | 62550978 | *SYT16* | 1.845126687 | -1.782078844 | -1.225030614 | -2.479174974 | -1.64770691 |
| 15 | 28200668 | *OCA2* | 2.518881996 | -0.492555962 | -0.033788597 | -1.497550494 | -0.582752192 |
| 15 | 53078063 | *ONECUT1* | 0.492523128 | -2.085127753 | -2.395715999 | 0.078886979 | 0.623835563 |
| 15 | 74420796 | *ISLR2* | 0.139473458 | -3.088227183 | -3.02021032 | -3.295037475 | -2.443098273 |
| 15 | 74421531 | *ISLR2* | 0.611295449 | -1.485844455 | -1.976280741 | -1.561307983 | -1.703714335 |
| 15 | 102009856 | *PCSK6* | 3.331012478 | 1.577210849 | 0.222278301 | -0.117611418 | -0.800410443 |
| 16 | 1417710 | *GNPTG,UNKL* | 4.606968993 | 2.205522025 | 2.851153807 | 3.182850673 | 0.713330196 |
| 16 | 54325319 | *IRX3* | 1.045385989 | -1.072424235 | -1.749070919 | 1.293761661 | -0.429764296 |
| 16 | 54408014 |  | 0.575075887 | -1.993586716 | -1.689463803 | 1.451504823 | -0.928751058 |
| 16 | 55362754 | *IRX6* | 0.276596856 | -1.891908164 | -2.108871214 | -0.470943936 | -2.644264249 |
| 16 | 71523436 | *ZNF23,ZNF19* | 2.970070651 | 0.216588154 | 0.885160776 | 3.287842082 | 2.298632117 |
| 16 | 86160795 |  | 3.096669921 | 0.602610923 | 1.169344708 | 1.297968196 | 3.038581331 |
| 16 | 88521287 | *ZFPM1* | 0.076699283 | -1.374676277 | -3.071462363 | -2.511988469 | -2.133876128 |
| 17 | 800512 | *NXN* | 1.00515471 | -1.113969665 | -1.155019392 | 0.383680285 | 0.151686515 |
| 17 | 4074172 | *ANKFY1,KRTAP4-6* | 3.231809934 | 0.166364366 | 1.906146473 | 0.949821234 | 1.132546663 |
| 17 | 7077709 | *ASGR1,KRTAP4-6* | 0.813408986 | -0.862480842 | -2.175039651 | 0.337953883 | -1.224348437 |
| 17 | 8958039 | *NTN1,KRTAP4-6* | 3.557735965 | 2.101817014 | 0.348590865 | 1.574701549 | 3.162026043 |
| 17 | 8958090 | *NTN1,KRTAP4-6* | 3.767632195 | 2.155012352 | 0.758884715 | 1.619667849 | 3.082745384 |
| 17 | 29297478 | *RNF135,DPRXP4,KRTAP4-6* | 0.227378548 | -2.474390024 | -2.298574498 | -2.436856724 | -2.246126373 |
| 17 | 46659993 | *HOXB3,HOXB4,MIR10A,HOXB5* | 0.47585355 | -3.008284489 | -2.755573143 | -1.669607907 | -3.298736915 |
| 17 | 55939590 | *CUEDC1* | 0.810044323 | -2.057086624 | -1.008672302 | -0.977973694 | -1.609012636 |
| 17 | 62341028 | *TEX2* | 0.263989095 | -2.112745702 | -1.723177625 | -2.194353202 | -1.022713573 |
| 17 | 78809873 | *RPTOR* | 3.071105347 | -0.192743835 | -0.789725028 | 0.751915936 | 0.838636342 |
| 17 | 79000676 | *FLJ90757,BAIAP2* | 2.890745953 | 0.671771647 | 0.329815359 | 0.768612163 | 1.531815198 |
| 17 | 80300749 | *SECTM1* | 2.685377528 | 0.859362899 | -0.265356377 | -0.455147473 | 2.139418465 |
| 17 | 80336414 | *UTS2R* | 3.812975089 | 0.603912794 | 1.928738892 | 0.01826751 | 0.602679553 |
| 17 | 80806375 | *ZNF750,TBCD* | 3.834632105 | 1.93480566 | 1.360778182 | 3.718209387 | 1.520039324 |
| 18 | 19780878 | *GATA6* | 3.585525943 | 1.850275357 | 1.183808019 | 3.407434378 | 1.758145 |
| 18 | 72201775 | *CNDP1* | 3.642262992 | 1.127456187 | 2.101533477 | 2.806911248 | 3.168562494 |
| 19 | 12753532 | *MAN2B1,ZNF490* | 5.892972704 | 0.320881155 | 5.69510768 | 4.90395553 | 5.310000662 |
| 19 | 17404977 | *ANKLE1,ABHD8* | 2.666579116 | -0.218859416 | 0.540173164 | 2.677736831 | -0.018892798 |

Regions exhibiting statistically differential genome-wide methylation for three NF1-PA tumors and two sporadic tumors are shown.

**Supplementary Table 3**. Coding Variants.

| **Case** | **Chr** | **Start** | **Ref** | **Var** | **Gene** | **Transcript** | **Type** | **Pos** | **Annotation** | **Ensembl VEP Condel** |
| --- | --- | --- | --- | --- | --- | --- | --- | --- | --- | --- |
| T01 | 3 | 151904217 | C | T | *FAM194A* | NM_152394.3 | Silent | c.159 | p.E53 | NA |
| T01 | 6 | 56476810 | T | C | *DST* | NM_183380.1 | Missense | c.12619 | p.M4207V | Deleterious |
| T01 | 10 | 29858680 | T | A | *SVIL* | NM_021738.3 | Missense | c.2206 | p.T736S | Deleterious |
| T02 | 9 | 106338255 | C | T | *OR13C3* | NM_001001961.1 | Missense | c.661 | p.D221N | Neutral |
| T02 | 10 | 124370861 | C | T | *DMBT1* | NM_007329.2 | Silent | c.5196 | p.H1732 | NA |
| T03 | 1 | 215860325 | T | C | *GPATCH2* | NM_018040.2 | Missense | c.196 | p.R66G | Deleterious |
| T03 | 19 | 18133853 | C | T | *PIK3R2* | NM_005027.2 | Missense | c.893 | p.A298V | Neutral |
| T03 | 19 | 22064077 | A | G | *ZNF257* | NM_033468.2 | Missense | c.1685 | p.N562S | Neutral |
| T03 | 3 | 198989671 | A | G | *FYTTD1* | NM_032288.1 | Missense | c.797 | p.D266G | Neutral |
| T03 | 5 | 56813606 | A | G | *ACTBL2* | NM_001017992.2 | Missense | c.686 | p.V229A | Neutral |

Validated somatic mutations identified in T01, T02, and T03 tumor samples are shown.

**Supplementary Table 4**. Variants in potential regulatory regions.

| **Case** | **Chr** | **Start** | **Stop** | **Ref** | **Var** | **Type** | **Gene** | **Transcript** | **Effect** | **Coding Pos** | **Protein Annotation** |
| --- | --- | --- | --- | --- | --- | --- | --- | --- | --- | --- | --- |
| T01 | 2 | 100997517 | 100997517 | C | T | SNP | *RPL31* | NM_001098577.4 | intronic | c.347-4375 | e4-4375 |
| T01 | 3 | 30907712 | 30907712 | C | T | SNP | *GADL1* | NM_207359.2 | 5_prime_flanking_region | c.-41122 | NULL |
| T01 | 5 | 19949671 | 19949671 | G | A | SNP | *CDH18* | NM_004934.2 | intronic | c.1+67255 | e0+67255 |
| T01 | 5 | 27031366 | 27031366 | T | A | SNP | *CDH9* | NM_016279.3 | intronic | c.1-7120 | e1-7120 |
| T01 | 5 | 102083936 | 102083936 | C | A | SNP | *0* | 0 | intergenic | 0 | 0 |
| T01 | 6 | 46247134 | 46247134 | C | T | SNP | *ENPP5* | NM_021572.4 | 5_prime_flanking_region | c.-3176 | NULL |
| T01 | 7 | 131130719 | 131130719 | G | A | SNP | *ENSG00000172400* | ENST00000305171 | 5_prime_flanking_region | c.-41399 | NULL |
| T01 | 9 | 11310853 | 11310853 | A | G | SNP | *0* | 0 | intergenic | 0 | 0 |
| T01 | 9 | 15113507 | 15113507 | A | G | SNP | *TTC39B* | NM_152574.1 | 3_prime_flanking_region | c.*48510 | NULL |
| T01 | 12 | 32806852 | 32806852 | G | T | SNP | *YARS2* | NM_001040436.1 | 5_prime_flanking_region | c.-6777 | NULL |
| T01 | 12 | 46452925 | 46452925 | T | G | SNP | *P11* | NM_006025.2 | 5_prime_flanking_region | c.-47462 | NULL |
| T01 | 12 | 97684691 | 97684691 | C | T | SNP | *ANKS1B* | NM_152788.2 | intronic | c.3504+6260 | e24+6260 |
| T01 | 13 | 67497906 | 67497906 | T | C | SNP | *0* | 0 | intergenic | 0 | 0 |
| T01 | 15 | 98150805 | 98150805 | G | T | SNP | *LOC644800* | XM_001715415.1 | 3_prime_untranslated_region | c.*160 | NULL |
| T01 | 17 | 37446708 | 37446708 | G | T | SNP | *ZNF385C* | ENST00000393873 | intronic | c.11-3282 | e2-3282 |
| T01 | 18 | 47604872 | 47604872 | C | T | SNP | *ENSG00000215457* | ENST00000400381 | 3_prime_flanking_region | c.*20501 | NULL |
| T01 | X | 107804508 | 107804508 | A | G | SNP | *COL4A5* | NM_033380.3 | intronic | c.3800-123 | e43-123 |
| T02 | 1 | 84746875 | 84746875 | T | C | SNP | *SPATA1* | NM_001081472.1 | intronic | c.1+2186 | e0+2186 |
| T02 | 2 | 17889545 | 17889545 | A | G | SNP | *KCNS3* | NM_002252.3 | 5_prime_flanking_region | c.-86212 | NULL |
| T02 | 3 | 80245384 | 80245384 | G | A | SNP | *0* | 0 | intergenic | 0 | 0 |
| T02 | 3 | 173931362 | 173931362 | C | G | SNP | *ECT2* | NM_018098.4 | 5_prime_flanking_region | c.-23653 | NULL |
| T02 | 4 | 80305236 | 80305236 | T | C | SNP | *0* | 0 | intergenic | 0 | 0 |
| T02 | 5 | 34897195 | 34897195 | C | T | SNP | *TTC23L* | NM_144725.3 | intronic | c.380-1565 | e4-1565 |
| T02 | 6 | 10919054 | 10919054 | C | A | SNP | *MAK* | NM_005906.3 | intronic | c.359-1893 | e5-1893 |
| T02 | 6 | 140885296 | 140885296 | G | A | SNP | *0* | 0 | intergenic | 0 | 0 |
| T02 | 7 | 18108418 | 18108418 | G | A | SNP | *MIRN1302-6* | ENST00000408466 | 3_prime_flanking_region | c.*24950 | NULL |
| T02 | 7 | 45077142 | 45077142 | C | T | SNP | *CCM2* | NM_001029835.1 | intronic | c.808+1057 | e6+1057 |
| T02 | 7 | 141486307 | 141486307 | T | C | SNP | *uc003vwz.1* | ENST00000397504 | intronic | c.1087-764 | e10-764 |
| T02 | 7 | 145148156 | 145148156 | G | A | SNP | *0* | 0 | intergenic | 0 | 0 |
| T02 | 10 | 38622182 | 38622182 | A | G | SNP | *ENSG00000220969* | ENST00000405818 | 5_prime_flanking_region | c.-42645 | NULL |
| T02 | 11 | 129845928 | 129845928 | G | A | SNP | *ADAMTS15* | NM_139055.1 | intronic | c.1721-97 | e6-97 |
| T02 | 14 | 44124578 | 44124578 | T | C | SNP | *0* | 0 | intergenic | 0 | 0 |
| T02 | 15 | 41410076 | 41410076 | C | G | SNP | *LCMT2* | NM_014793.3 | 5_prime_untranslated_region | c.-97 | NULL |
| T02 | 15 | 93130028 | 93130028 | C | T | SNP | *0* | 0 | intergenic | 0 | 0 |
| T02 | 15 | 98174924 | 98174924 | G | A | SNP | *C15orf51* | ENST00000341853 | 5_prime_flanking_region | c.-12307 | NULL |
| T02 | 16 | 8134264 | 8134264 | G | A | SNP | *0* | 0 | intergenic | 0 | 0 |
| T02 | 16 | 68049461 | 68049461 | G | A | SNP | *CYB5B* | NM_030579.2 | intronic | c.334-1036 | e4-1036 |
| T02 | 18 | 11006471 | 11006471 | C | T | SNP | *0* | 0 | intergenic | 0 | 0 |
| T02 | 20 | 13542843 | 13542843 | T | C | SNP | *TASP1* | NM_017714.2 | intronic | c.282+9250 | e3+9250 |
| T02 | 20 | 49920206 | 49920206 | G | A | SNP | *RNU7* | ENST00000388033 | 5_prime_flanking_region | c.-34709 | NULL |
| T02 | 20 | 59035708 | 59035708 | T | G | SNP | *0* | 0 | intergenic | 0 | 0 |
| T02 | 20 | 59035709 | 59035709 | G | A | SNP | *0* | 0 | intergenic | 0 | 0 |
| T02 | 21 | 17844195 | 17844195 | T | C | SNP | *CXADR* | NM_001338.3 | intronic | c.211-1743 | e3-1743 |
| T02 | X | 22409834 | 22409834 | T | C | SNP | *ENSG00000201095* | ENST00000364225 | 5_prime_flanking_region | c.-46039 | NULL |
| T02 | X | 44036019 | 44036019 | G | A | SNP | *EFHC2* | NM_025184.3 | intronic | c.232-18993 | e3-18993 |
| T02 | X | 84227244 | 84227244 | C | G | SNP | *APOOL* | NM_198450.3 | intronic | c.719-2008 | e9-2008 |
| T02 | X | 112620721 | 112620721 | T | A | SNP | *ENSG00000220541* | ENST00000403700 | 5_prime_flanking_region | c.-31668 | NULL |
| T02 | X | 146476541 | 146476541 | C | T | SNP | *ENSG00000219655* | ENST00000405281 | 3_prime_flanking_region | c.*4281 | NULL |
| T03 | 1 | 1068582 | 1068582 | C | T | SNP | *TTLL10* | NM_153254.1 | 5_prime_flanking_region | c.-36715 | NULL |
| T03 | 1 | 71781875 | 71781875 | T | C | SNP | *NEGR1* | NM_173808.2 | intronic | c.940+49213 | e6+49213 |
| T03 | 10 | 50435729 | 50435729 | A | G | SNP | *ERCC6* | NM_000124.2 | 5_prime_flanking_region | c.-24713 | NULL |
| T03 | 10 | 133645791 | 133645791 | T | G | SNP | *BNIP3* | NM_004052.2 | 5_prime_flanking_region | c.-491 | NULL |
| T03 | 11 | 21880870 | 21880870 | C | T | SNP | *0* | 0 | intergenic | 0 | 0 |
| T03 | 12 | 110135262 | 110135262 | C | T | SNP | *CUX2* | NM_015267.2 | intronic | c.64-1125 | e2-1125 |
| T03 | 13 | 76798849 | 76798849 | T | A | SNP | *MYCBP2* | NM_015057.3 | intronic | c.1-30 | e1-30 |
| T03 | 15 | 57697409 | 57697409 | G | A | SNP | *GCNT3* | NM_004751.1 | intronic | c.1-261 | e1-261 |
| T03 | 17 | 15106477 | 15106477 | A | G | SNP | *PMP22* | NM_153321.2 | 5_prime_untranslated_region | c.-1708 | NULL |
| T03 | 18 | 65731390 | 65731390 | C | T | SNP | *CD226* | NM_006566.2 | intronic | c.383-17129 | e3-17129 |
| T03 | 8 | 11521546 | 11521546 | G | A | SNP | *C8orf14* | ENST00000304233 | 3_prime_flanking_region | c.*45480 | NULL |
| T03 | 8 | 67467300 | 67467300 | G | A | SNP | *ADHFE1* | NM_144650.2 | 5_prime_flanking_region | c.-40006 | NULL |
| T03 | 8 | 113351249 | 113351249 | T | C | SNP | *CSMD3* | NM_198123.2 | intronic | c.9509-4254 | e60-4254 |
| T03 | 9 | 35781470 | 35781470 | C | A | SNP | *NPR2* | NM_003995.3 | 5_prime_flanking_region | c.-936 | NULL |
| T03 | X | 144398053 | 144398053 | G | A | SNP | *0* | 0 | intergenic | 0 | 0 |

High confidence somatic mutations following visual inspection in T01, T02, and T03 tumor are shown.

**Supplementary Table 5**. Variants in non-repetitive DNA, excluding coding variants and potential regulatory regions.

| **Case** | **Chr** | **Start** | **Stop** | **Ref** | **Var** | **Type** | **Gene** | **Transcript** | **Effect** | **Coding Pos** | **Protein Annotation** |
| --- | --- | --- | --- | --- | --- | --- | --- | --- | --- | --- | --- |
| T01 | 1 | 28824215 | 28824215 | C | T | SNP | *TAF12* | NM_005644.1 | intronic | c.1-2951 | e1-2951 |
| T01 | 1 | 44204501 | 44204501 | G | A | SNP | *IPO13* | ENST00000372339 | 5_prime_untranslated_region | c.-282 | NULL |
| T01 | 1 | 59626842 | 59626842 | C | T | SNP | *FGGY* | NM_018291.1 | intronic | c.218+9745 | e2+9745 |
| T01 | 1 | 63587009 | 63587009 | C | T | SNP | *ALG6* | NM_013339.3 | 5_prime_flanking_region | c.-22228 | NULL |
| T01 | 1 | 70348968 | 70348968 | A | G | SNP | *LRRC7* | NM_020794.2 | intronic | c.4506+2871 | e24+2871 |
| T01 | 1 | 101589808 | 101589808 | C | T | SNP | *0* | 0 | 0 | 0 | 0 |
| T01 | 1 | 119544423 | 119544423 | A | G | SNP | *LOC343495* | XR_016540.2 | 3_prime_flanking_region | c.*18618 | NULL |
| T01 | 1 | 159953603 | 159953603 | G | A | SNP | *DUSP12* | NM_007240.1 | 5_prime_flanking_region | c.-32613 | NULL |
| T01 | 1 | 195152645 | 195152645 | A | G | SNP | *CFHR4* | NM_006684.2 | intronic | c.800-1318 | e6-1318 |
| T01 | 1 | 200342462 | 200342462 | C | G | SNP | *GPR37L1* | NM_004767.3 | 5_prime_flanking_region | c.-16253 | NULL |
| T01 | 1 | 216276225 | 216276225 | C | T | SNP | *0* | 0 | 0 | 0 | 0 |
| T01 | 2 | 18172237 | 18172237 | A | G | SNP | *0* | 0 | 0 | 0 | 0 |
| T01 | 2 | 39016515 | 39016515 | G | C | SNP | *ENSG00000214694* | ENST00000409978 | intronic | c.565+36 | e6+36 |
| T01 | 2 | 52613745 | 52613745 | G | A | SNP | *ENSG00000204993* | ENST00000378256 | 5_prime_flanking_region | c.-37524 | NULL |
| T01 | 2 | 84904905 | 84904905 | C | T | SNP | *LOC129293* | NM_001080824.1 | intronic | c.936-66 | e5-66 |
| T01 | 2 | 146080180 | 146080180 | G | A | SNP | *0* | 0 | 0 | 0 | 0 |
| T01 | 2 | 179394312 | 179394312 | C | A | SNP | *TTN* | NM_133379.3 | 5_prime_flanking_region | c.-16698 | NULL |
| T01 | 2 | 180055517 | 180055517 | C | T | SNP | *ZNF385B* | NM_152520.1 | intronic | c.670+727 | e4+727 |
| T01 | 2 | 206409392 | 206409392 | A | G | SNP | *NRP2* | NM_201266.2 | 3_prime_flanking_region | c.*41365 | NULL |
| T01 | 2 | 242631075 | 242631075 | G | A | SNP | *ENSG00000204098* | ENST00000373269 | intronic | c.128-23544 | e2-23544 |
| T01 | 3 | 29469974 | 29469974 | G | C | SNP | *RBMS3* | NM_001003793.1 | intronic | c.248+18564 | e2+18564 |
| T01 | 3 | 36425960 | 36425960 | C | T | SNP | *STAC* | NM_003149.1 | intronic | c.111+28710 | e1+28710 |
| T01 | 3 | 45937980 | 45937980 | T | C | SNP | *FYCO1* | NM_024513.2 | 3_prime_untranslated_region | c.*281 | NULL |
| T01 | 3 | 77716641 | 77716641 | C | T | SNP | *ROBO2* | NM_002942.1 | intronic | c.2501-3951 | e17-3951 |
| T01 | 3 | 89485738 | 89485738 | C | T | SNP | *EPHA3* | NM_005233.5 | intronic | c.1306+11808 | e5+11808 |
| T01 | 3 | 125382424 | 125382424 | A | G | SNP | *KALRN* | NM_001024660.2 | intronic | c.68-47103 | e2-47103 |
| T01 | 3 | 179655995 | 179655995 | G | A | SNP | *ENSG00000208463* | ENST00000385728 | 5_prime_flanking_region | c.-26224 | NULL |
| T01 | 3 | 184700814 | 184700814 | G | T | SNP | *KLHL6* | NM_130446.2 | intronic | c.910-505 | e4-505 |
| T01 | 4 | 36164684 | 36164684 | A | C | SNP | *0* | 0 | 0 | 0 | 0 |
| T01 | 4 | 44027921 | 44027921 | A | C | SNP | *KCTD8* | NM_198353.2 | intronic | c.961+116416 | e1+116416 |
| T01 | 4 | 60540934 | 60540934 | T | C | SNP | *0* | 0 | 0 | 0 | 0 |
| T01 | 4 | 71872174 | 71872174 | T | G | SNP | *RUFY3* | NM_001037442.2 | intronic | c.1072-1213 | e11-1213 |
| T01 | 4 | 74684958 | 74684958 | C | T | SNP | *RASSF6* | NM_201431.3 | intronic | c.162-1659 | e3-1659 |
| T01 | 4 | 93472129 | 93472129 | C | T | SNP | *GRID2* | NM_001510.2 | intronic | c.88+27211 | e1+27211 |
| T01 | 4 | 163846850 | 163846850 | C | A | SNP | *0* | 0 | 0 | 0 | 0 |
| T01 | 5 | 20113363 | 20113363 | G | A | SNP | *0* | 0 | 0 | 0 | 0 |
| T01 | 5 | 26996273 | 26996273 | C | T | SNP | *CDH9* | NM_016279.3 | intronic | c.228+27697 | e1+27697 |
| T01 | 5 | 27267862 | 27267862 | T | G | SNP | *0* | 0 | 0 | 0 | 0 |
| T01 | 5 | 28786303 | 28786303 | C | G | SNP | *0* | 0 | 0 | 0 | 0 |
| T01 | 5 | 37400307 | 37400307 | T | C | SNP | *NUP155* | NM_153485.2 | intronic | c.158-64 | e2-64 |
| T01 | 5 | 37852556 | 37852556 | C | T | SNP | *GDNF* | NM_000514.2 | intronic | c.152-562 | e2-562 |
| T01 | 5 | 44545260 | 44545260 | T | C | SNP | *0* | 0 | 0 | 0 | 0 |
| T01 | 5 | 71737413 | 71737413 | C | A | SNP | *PTCD2* | NM_024754.3 | 3_prime_flanking_region | c.*47403 | NULL |
| T01 | 5 | 94479704 | 94479704 | A | C | SNP | *MCTP1* | NM_024717.2 | intronic | c.721-100760 | e2-100760 |
| T01 | 5 | 95817419 | 95817419 | T | A | SNP | *PCSK1* | NM_000439.3 | 5_prime_flanking_region | c.-22917 | NULL |
| T01 | 5 | 149938078 | 149938078 | C | T | SNP | *SYNPO* | ENST00000314840 | 5_prime_flanking_region | c.-40045 | NULL |
| T01 | 5 | 151629921 | 151629921 | C | T | SNP | *0* | 0 | 0 | 0 | 0 |
| T01 | 5 | 162634475 | 162634475 | C | T | SNP | *0* | 0 | 0 | 0 | 0 |
| T01 | 6 | 15860583 | 15860583 | C | G | SNP | *0* | 0 | 0 | 0 | 0 |
| T01 | 6 | 33964768 | 33964768 | C | T | SNP | *LOC100132252* | XM_001724521.1 | 3_prime_flanking_region | c.*5566 | NULL |
| T01 | 6 | 51810542 | 51810542 | C | A | SNP | *PKHD1* | NM_138694.3 | intronic | c.8108-1316 | e50-1316 |
| T01 | 6 | 70142639 | 70142639 | A | C | SNP | *BAI3* | NM_001704.2 | intronic | c.4275+3585 | e28+3585 |
| T01 | 6 | 70149733 | 70149733 | A | G | SNP | *BAI3* | NM_001704.2 | intronic | c.4380+185 | e29+185 |
| T01 | 6 | 79576445 | 79576445 | G | A | SNP | *0* | 0 | 0 | 0 | 0 |
| T01 | 6 | 96769318 | 96769318 | A | C | SNP | *FUT9* | NM_006581.3 | 3_prime_untranslated_region | c.*10486 | NULL |
| T01 | 6 | 103945488 | 103945488 | T | C | SNP | *0* | 0 | 0 | 0 | 0 |
| T01 | 6 | 105528443 | 105528443 | A | G | SNP | *LIN28B* | NM_001004317.2 | intronic | c.198+15589 | e2+15589 |
| T01 | 6 | 124820894 | 124820894 | C | G | SNP | *NKAIN2* | NM_001040214.1 | intronic | c.273+102702 | e3+102702 |
| T01 | 6 | 139249954 | 139249954 | T | C | SNP | *ECT2L* | NM_001077706.1 | intronic | c.2325+202 | e17+202 |
| T01 | 6 | 161489510 | 161489510 | C | T | SNP | *AGPAT4* | NM_020133.2 | intronic | c.767+699 | e5+699 |
| T01 | 6 | 162448950 | 162448950 | T | C | SNP | *PARK2* | NM_004562.2 | intronic | c.535-53754 | e5-53754 |
| T01 | 7 | 52923025 | 52923025 | C | T | SNP | *0* | 0 | 0 | 0 | 0 |
| T01 | 7 | 114529747 | 114529747 | A | G | SNP | *ENSG00000219522* | ENST00000403399 | 3_prime_flanking_region | c.*34018 | NULL |
| T01 | 7 | 135854082 | 135854082 | T | G | SNP | *0* | 0 | 0 | 0 | 0 |
| T01 | 8 | 2245866 | 2245866 | G | A | SNP | *0* | 0 | 0 | 0 | 0 |
| T01 | 8 | 32566014 | 32566014 | G | C | SNP | *NRG1* | NM_013956.2 | intronic | c.101-6874 | e2-6874 |
| T01 | 8 | 33137675 | 33137675 | A | G | SNP | *0* | 0 | 0 | 0 | 0 |
| T01 | 8 | 48400723 | 48400723 | A | G | SNP | *KIAA0146* | NM_001080394.1 | intronic | c.525+31551 | e5+31551 |
| T01 | 8 | 67648420 | 67648420 | C | T | SNP | *MYBL1* | NM_001080416.2 | intronic | c.1471-125 | e11-125 |
| T01 | 8 | 72712759 | 72712759 | C | A | SNP | *0* | 0 | 0 | 0 | 0 |
| T01 | 8 | 97710144 | 97710144 | G | A | SNP | *PGCP* | NM_016134.2 | 5_prime_flanking_region | c.-156158 | NULL |
| T01 | 8 | 116914875 | 116914875 | C | T | SNP | *0* | 0 | 0 | 0 | 0 |
| T01 | 8 | 118093507 | 118093507 | G | C | SNP | *SLC30A8* | ENST00000297345 | intronic | c.1-27132 | e1-27132 |
| T01 | 9 | 24676749 | 24676749 | C | T | SNP | *0* | 0 | 0 | 0 | 0 |
| T01 | 9 | 78665768 | 78665768 | G | A | SNP | *PRUNE2* | ENST00000376713 | intronic | c.37-6824 | e2-6824 |
| T01 | 9 | 111752569 | 111752569 | C | T | SNP | *PALM2* | NM_053016.1 | 3_prime_untranslated_region | c.*7043 | NULL |
| T01 | 9 | 137554286 | 137554286 | G | A | SNP | *LCN1* | NM_002297.2 | intronic | c.221+442 | e2+442 |
| T01 | 10 | 45332454 | 45332454 | T | C | SNP | *MARCH8* | NM_001002265.1 | intronic | c.102+16110 | e1+16110 |
| T01 | 10 | 57786394 | 57786394 | G | C | SNP | *ZWINT* | NM_007057.1 | 3_prime_flanking_region | c.*1791 | NULL |
| T01 | 10 | 69828510 | 69828510 | T | C | SNP | *RUFY2* | NM_017987.1 | intronic | c.402-1866 | e4-1866 |
| T01 | 10 | 107472153 | 107472153 | T | G | SNP | *ENSG00000218440* | ENST00000402674 | 5_prime_flanking_region | c.-36540 | NULL |
| T01 | 11 | 5967357 | 5967357 | C | T | SNP | *OR52L1* | NM_001005173.2 | 5_prime_flanking_region | c.-2621 | NULL |
| T01 | 11 | 16158825 | 16158825 | A | G | SNP | *SOX6* | NM_033326.1 | intronic | c.777+3183 | e5+3183 |
| T01 | 11 | 38135552 | 38135552 | G | A | SNP | *0* | 0 | 0 | 0 | 0 |
| T01 | 12 | 10726695 | 10726695 | G | A | SNP | *STYK1* | NM_018423.2 | 5_prime_flanking_region | c.-48211 | NULL |
| T01 | 12 | 49771042 | 49771042 | C | T | SNP | *CSRNP2* | NM_030809.1 | 5_prime_flanking_region | c.-14431 | NULL |
| T01 | 12 | 88331506 | 88331506 | G | A | SNP | *WDR51B* | NM_172240.1 | 3_prime_flanking_region | c.*7555 | NULL |
| T01 | 12 | 126989477 | 126989477 | T | G | SNP | *0* | 0 | 0 | 0 | 0 |
| T01 | 13 | 33688918 | 33688918 | G | A | SNP | *0* | 0 | 0 | 0 | 0 |
| T01 | 13 | 37181908 | 37181908 | C | T | SNP | *TRPC4* | NM_016179.1 | intronic | c.898-17436 | e3-17436 |
| T01 | 13 | 55359331 | 55359331 | A | T | SNP | *0* | 0 | 0 | 0 | 0 |
| T01 | 13 | 58923717 | 58923717 | T | C | SNP | *0* | 0 | 0 | 0 | 0 |
| T01 | 13 | 98826631 | 98826631 | T | G | SNP | *UBAC2* | NM_177967.1 | intronic | c.822+8470 | e6+8470 |
| T01 | 14 | 29781174 | 29781174 | C | T | SNP | *0* | 0 | 0 | 0 | 0 |
| T01 | 14 | 43291074 | 43291074 | C | T | SNP | *0* | 0 | 0 | 0 | 0 |
| T01 | 14 | 91592400 | 91592400 | G | A | SNP | *TRIP11* | NM_004239.2 | 5_prime_flanking_region | c.-16618 | NULL |
| T01 | 15 | 20223321 | 20223321 | C | T | SNP | *uc010axx.1* | ENST00000341390 | 3_prime_flanking_region | c.*33359 | NULL |
| T01 | 15 | 49726000 | 49726000 | A | G | SNP | *SCG3* | NM_013243.2 | 5_prime_flanking_region | c.-35245 | NULL |
| T01 | 15 | 72298541 | 72298541 | C | T | SNP | *ENSG00000214701* | ENST00000398819 | intronic | c.675+286 | e2+286 |
| T01 | 15 | 84304302 | 84304302 | G | T | SNP | *0* | 0 | 0 | 0 | 0 |
| T01 | 16 | 31514202 | 31514202 | C | T | SNP | *LOC730196* | XR_015841.1 | 3_prime_flanking_region | c.*47643 | NULL |
| T01 | 16 | 57941890 | 57941890 | C | T | SNP | *0* | 0 | 0 | 0 | 0 |
| T01 | 17 | 52073918 | 52073918 | A | T | SNP | *NOG* | NM_005450.4 | 3_prime_flanking_region | c.*46636 | NULL |
| T01 | 17 | 70072540 | 70072540 | C | A | SNP | *LOC100130520* | XM_001714652.1 | intronic | c.26-531 | e3-531 |
| T01 | 18 | 26314396 | 26314396 | G | A | SNP | *0* | 0 | 0 | 0 | 0 |
| T01 | 18 | 63135780 | 63135780 | T | G | SNP | *0* | 0 | 0 | 0 | 0 |
| T01 | 19 | 43658142 | 43658142 | A | G | SNP | *RYR1* | NM_000540.2 | intronic | c.4293+212 | e29+212 |
| T01 | 20 | 49568120 | 49568120 | T | C | SNP | *NFATC2* | NM_173091.1 | intronic | c.1161-1219 | e3-1219 |
| T01 | 21 | 23782667 | 23782667 | G | T | SNP | *0* | 0 | 0 | 0 | 0 |
| T01 | 21 | 25039635 | 25039635 | G | A | SNP | *0* | 0 | 0 | 0 | 0 |
| T01 | X | 34254180 | 34254180 | T | C | SNP | *0* | 0 | 0 | 0 | 0 |
| T01 | X | 129227214 | 129227214 | C | T | SNP | *ZNF280C* | NM_017666.3 | intronic | c.1+3203 | e0+3203 |
| T01 | X | 134806333 | 134806333 | T | C | SNP | *SAGE1* | NM_018666.2 | intronic | c.87+179 | e1+179 |
| T02 | 1 | 19596146 | 19596146 | T | C | SNP | *CAPZB* | NM_004930.2 | intronic | c.94-11439 | e3-11439 |
| T02 | 1 | 40804068 | 40804068 | T | C | SNP | *ZNF684* | NM_152373.2 | 3_prime_flanking_region | c.*18349 | NULL |
| T02 | 1 | 79435554 | 79435554 | C | T | SNP | *0* | 0 | 0 | 0 | 0 |
| T02 | 1 | 80831237 | 80831237 | T | C | SNP | *0* | 0 | 0 | 0 | 0 |
| T02 | 1 | 105316376 | 105316376 | C | A | SNP | *0* | 0 | 0 | 0 | 0 |
| T02 | 1 | 162039370 | 162039370 | A | G | SNP | *ENSG00000219510* | ENST00000401946 | 5_prime_flanking_region | c.-33818 | NULL |
| T02 | 1 | 204987243 | 204987243 | C | T | SNP | *MAPKAPK2* | NM_032960.3 | 3_prime_flanking_region | c.*14557 | NULL |
| T02 | 1 | 205136506 | 205136506 | T | C | SNP | *IL24* | NM_006850.2 | 5_prime_flanking_region | c.-1295 | NULL |
| T02 | 2 | 25887067 | 25887067 | C | T | SNP | *ASXL2* | NM_018263.4 | intronic | c.144-4357 | e4-4357 |
| T02 | 2 | 31746846 | 31746846 | G | A | SNP | *0* | 0 | 0 | 0 | 0 |
| T02 | 2 | 60537219 | 60537219 | C | T | SNP | *BCL11A* | NM_018014.3 | intronic | c.2231-3914 | e5-3914 |
| T02 | 2 | 76646919 | 76646919 | C | T | SNP | *ENSG00000208903* | ENST00000386168 | 3_prime_flanking_region | c.*29208 | NULL |
| T02 | 2 | 103903413 | 103903413 | C | T | SNP | *0* | 0 | 0 | 0 | 0 |
| T02 | 2 | 107767707 | 107767707 | T | C | SNP | *RGPD4* | ENST00000354986 | 5_prime_flanking_region | c.-42195 | NULL |
| T02 | 2 | 115259270 | 115259270 | C | T | SNP | *DPP10* | NM_020868.2 | intronic | c.60+342385 | e1+342385 |
| T02 | 2 | 116536282 | 116536282 | G | A | SNP | *0* | 0 | 0 | 0 | 0 |
| T02 | 2 | 121014290 | 121014290 | C | A | SNP | *0* | 0 | 0 | 0 | 0 |
| T02 | 2 | 156839570 | 156839570 | G | A | SNP | *NR4A2* | NM_006186.3 | 3_prime_flanking_region | c.*50932 | NULL |
| T02 | 2 | 193611425 | 193611425 | G | T | SNP | *0* | 0 | 0 | 0 | 0 |
| T02 | 2 | 220555135 | 220555135 | C | T | SNP | *0* | 0 | 0 | 0 | 0 |
| T02 | 2 | 222677853 | 222677853 | G | T | SNP | *0* | 0 | 0 | 0 | 0 |
| T02 | 2 | 237151487 | 237151487 | C | T | SNP | *CXCR7* | NM_020311.2 | intronic | c.1-2335 | e1-2335 |
| T02 | 3 | 33968652 | 33968652 | G | A | SNP | *0* | 0 | 0 | 0 | 0 |
| T02 | 3 | 47119936 | 47119936 | T | C | SNP | *SETD2* | NM_014159.6 | intronic | c.3331-19 | e5-19 |
| T02 | 3 | 55610546 | 55610546 | T | G | SNP | *ERC2* | NM_015576.1 | intronic | c.2874+82316 | e16+82316 |
| T02 | 3 | 97705171 | 97705171 | C | T | SNP | *0* | 0 | 0 | 0 | 0 |
| T02 | 3 | 117118424 | 117118424 | G | C | SNP | *LSAMP* | NM_002338.2 | intronic | c.515-64270 | e4-64270 |
| T02 | 3 | 150782837 | 150782837 | C | T | SNP | *WWTR1* | NM_015472.3 | intronic | c.432-9360 | e2-9360 |
| T02 | 3 | 164450886 | 164450886 | C | T | SNP | *LOC647109* | XM_930126.1 | 5_prime_flanking_region | c.-30266 | NULL |
| T02 | 3 | 176193687 | 176193687 | G | A | SNP | *NAALADL2* | NM_207015.2 | intronic | c.44-103587 | e2-103587 |
| T02 | 4 | 13519164 | 13519164 | G | A | SNP | *0* | 0 | 0 | 0 | 0 |
| T02 | 4 | 41809362 | 41809362 | G | A | SNP | *BEND4* | NM_207406.2 | 3_prime_untranslated_region | c.*4930 | NULL |
| T02 | 4 | 43004043 | 43004043 | C | T | SNP | *0* | 0 | 0 | 0 | 0 |
| T02 | 4 | 109269223 | 109269223 | C | T | SNP | *LEF1* | NM_016269.1 | intronic | c.414+34950 | e3+34950 |
| T02 | 4 | 151043051 | 151043051 | C | T | SNP | *ENSG00000202331* | ENST00000365461 | 5_prime_flanking_region | c.-5119 | NULL |
| T02 | 4 | 171909166 | 171909166 | T | A | SNP | *0* | 0 | 0 | 0 | 0 |
| T02 | 4 | 179852819 | 179852819 | C | A | SNP | *ENSG00000212191* | ENST00000390889 | 5_prime_flanking_region | c.-8715 | NULL |
| T02 | 4 | 186926217 | 186926217 | G | A | SNP | *SORBS2* | NM_021069.1 | intronic | c.1+7158 | e0+7158 |
| T02 | 4 | 189538910 | 189538910 | T | C | SNP | *LOC152663* | XM_087499.1 | 5_prime_flanking_region | c.-30738 | NULL |
| T02 | 5 | 622066 | 622066 | G | A | SNP | *CEP72* | NM_018140.3 | 5_prime_flanking_region | c.-43411 | NULL |
| T02 | 5 | 4250884 | 4250884 | C | G | SNP | *0* | 0 | 0 | 0 | 0 |
| T02 | 5 | 23419819 | 23419819 | T | C | SNP | *0* | 0 | 0 | 0 | 0 |
| T02 | 5 | 24070320 | 24070320 | G | A | SNP | *ENSG00000200600* | ENST00000363730 | 5_prime_flanking_region | c.-39851 | NULL |
| T02 | 5 | 61201930 | 61201930 | C | T | SNP | *0* | 0 | 0 | 0 | 0 |
| T02 | 5 | 85320322 | 85320322 | T | C | SNP | *0* | 0 | 0 | 0 | 0 |
| T02 | 5 | 106162931 | 106162931 | C | T | SNP | *0* | 0 | 0 | 0 | 0 |
| T02 | 5 | 124631829 | 124631829 | G | A | SNP | *0* | 0 | 0 | 0 | 0 |
| T02 | 5 | 145586038 | 145586038 | C | T | SNP | *RBM27* | ENST00000265271 | intronic | c.304-2664 | e4-2664 |
| T02 | 5 | 156587014 | 156587014 | T | G | SNP | *ITK* | NM_005546.3 | intronic | c.648-870 | e7-870 |
| T02 | 5 | 164822289 | 164822289 | G | A | SNP | *0* | 0 | 0 | 0 | 0 |
| T02 | 6 | 48164912 | 48164912 | T | C | SNP | *C6orf138* | NM_001013732.2 | 5_prime_flanking_region | c.-20613 | NULL |
| T02 | 6 | 87707298 | 87707298 | G | A | SNP | *HTR1E* | NM_000865.2 | intronic | c.1+3038 | e0+3038 |
| T02 | 6 | 89478381 | 89478381 | T | A | SNP | *RNGTT* | NM_003800.3 | intronic | c.1440-33524 | e14-33524 |
| T02 | 6 | 101059078 | 101059078 | T | C | SNP | *SIM1* | NM_005068.2 | 5_prime_flanking_region | c.-41013 | NULL |
| T02 | 6 | 101440828 | 101440828 | G | A | SNP | *ASCC3* | NM_006828.2 | 5_prime_flanking_region | c.-18234 | NULL |
| T02 | 6 | 129315119 | 129315119 | T | A | SNP | *LAMA2* | NM_000426.3 | intronic | c.112+68924 | e1+68924 |
| T02 | 6 | 147798537 | 147798537 | G | A | SNP | *STXBP5* | NM_139244.1 | 3_prime_flanking_region | c.*50953 | NULL |
| T02 | 6 | 161841043 | 161841043 | C | T | SNP | *PARK2* | NM_004562.2 | intronic | c.1083+48833 | e9+48833 |
| T02 | 6 | 162120799 | 162120799 | C | T | SNP | *PARK2* | NM_004562.2 | intronic | c.871+5995 | e7+5995 |
| T02 | 6 | 170271802 | 170271802 | C | A | SNP | *0* | 0 | 0 | 0 | 0 |
| T02 | 7 | 26694709 | 26694709 | G | A | SNP | *SKAP2* | NM_003930.3 | intronic | c.874+1720 | e10+1720 |
| T02 | 7 | 53339841 | 53339841 | A | T | SNP | *0* | 0 | 0 | 0 | 0 |
| T02 | 7 | 108656108 | 108656108 | C | T | SNP | *0* | 0 | 0 | 0 | 0 |
| T02 | 7 | 118755296 | 118755296 | G | A | SNP | *0* | 0 | 0 | 0 | 0 |
| T02 | 7 | 137221608 | 137221608 | G | C | SNP | *CREB3L2* | NM_194071.2 | intronic | c.1044-820 | e9-820 |
| T02 | 8 | 11143544 | 11143544 | C | T | SNP | *ENSG00000196848* | ENST00000355043 | intronic | c.NULL | NULL |
| T02 | 8 | 29018942 | 29018942 | C | T | SNP | *KIF13B* | NM_015254.3 | intronic | c.4215+2633 | e35+2633 |
| T02 | 8 | 40227585 | 40227585 | C | T | SNP | *0* | 0 | 0 | 0 | 0 |
| T02 | 8 | 69343304 | 69343304 | A | G | SNP | *ENSG00000211261* | ENST00000388526 | 5_prime_flanking_region | c.-38045 | NULL |
| T02 | 8 | 75201930 | 75201930 | G | A | SNP | *ENSG00000212485* | ENST00000391183 | 3_prime_flanking_region | c.*47498 | NULL |
| T02 | 8 | 87959573 | 87959573 | T | C | SNP | *CNBD1* | NM_173538.2 | intronic | c.89-9313 | e2-9313 |
| T02 | 8 | 92446899 | 92446899 | C | T | SNP | *SLC26A7* | NM_134266.2 | intronic | c.1489-1085 | e13-1085 |
| T02 | 8 | 93015088 | 93015088 | C | A | SNP | *RUNX1T1* | NM_175634.2 | 3_prime_flanking_region | c.*26558 | NULL |
| T02 | 8 | 141333876 | 141333876 | C | T | SNP | *TRAPPC9* | NM_031466.4 | intronic | c.2573-1666 | e16-1666 |
| T02 | 9 | 10378129 | 10378129 | G | A | SNP | *PTPRD* | NM_002839.1 | intronic | c.1-47112 | e1-47112 |
| T02 | 9 | 18412586 | 18412586 | C | T | SNP | *0* | 0 | 0 | 0 | 0 |
| T02 | 9 | 25734817 | 25734817 | T | A | SNP | *0* | 0 | 0 | 0 | 0 |
| T02 | 9 | 96465916 | 96465916 | C | A | SNP | *C9orf118* | ENST00000375324 | intronic | c.174+181 | e3+181 |
| T02 | 9 | 97527647 | 97527647 | C | T | SNP | *ENSG00000175611* | ENST00000375268 | 3_prime_flanking_region | c.*149631 | NULL |
| T02 | 9 | 101125466 | 101125466 | G | A | SNP | *ENSG00000222337* | ENST00000410405 | 3_prime_flanking_region | c.*39024 | NULL |
| T02 | 9 | 103417388 | 103417388 | A | G | SNP | *GRIN3A* | NM_133445.2 | intronic | c.2615-1758 | e6-1758 |
| T02 | 9 | 110449838 | 110449838 | C | T | SNP | *LOC347292* | XM_294581.1 | 3_prime_flanking_region | c.*20587 | NULL |
| T02 | 9 | 119070515 | 119070515 | A | T | SNP | *ASTN2* | NM_198187.3 | intronic | c.630+22911 | e2+22911 |
| T02 | 9 | 119990420 | 119990420 | G | A | SNP | *0* | 0 | 0 | 0 | 0 |
| T02 | 10 | 2685628 | 2685628 | C | T | SNP | *0* | 0 | 0 | 0 | 0 |
| T02 | 10 | 7789490 | 7789490 | C | A | SNP | *ITIH2* | NM_002216.2 | intronic | c.192+288 | e3+288 |
| T02 | 10 | 8937098 | 8937098 | G | T | SNP | *LOC100133979* | XR_037040.1 | 3_prime_flanking_region | c.*48147 | NULL |
| T02 | 10 | 22864841 | 22864841 | T | C | SNP | *PIP4K2A* | NM_005028.4 | 3_prime_untranslated_region | c.*1295 | NULL |
| T02 | 10 | 47037012 | 47037012 | G | T | SNP | *ENSG00000215044* | ENST00000399501 | 5_prime_flanking_region | c.-27373 | NULL |
| T02 | 10 | 102636676 | 102636676 | C | T | SNP | *FAM178A* | NM_018121.1 | 5_prime_flanking_region | c.-26182 | NULL |
| T02 | 10 | 109689218 | 109689218 | T | C | SNP | *LOC100128304* | XM_001718321.1 | 5_prime_flanking_region | c.-24053 | NULL |
| T02 | 11 | 90444170 | 90444170 | A | G | SNP | *0* | 0 | 0 | 0 | 0 |
| T02 | 11 | 101391854 | 101391854 | A | G | SNP | *C11orf70* | NM_032930.1 | 5_prime_flanking_region | c.-31906 | NULL |
| T02 | 11 | 127389974 | 127389974 | A | G | SNP | *0* | 0 | 0 | 0 | 0 |
| T02 | 12 | 4262412 | 4262412 | C | T | SNP | *CCND2* | NM_001759.3 | intronic | c.571+4066 | e3+4066 |
| T02 | 12 | 61165565 | 61165565 | T | C | SNP | *MON2* | NM_015026.2 | intronic | c.175+1285 | e2+1285 |
| T02 | 12 | 69386910 | 69386910 | C | A | SNP | *PTPRR* | NM_002849.2 | intronic | c.1008-5540 | e7-5540 |
| T02 | 12 | 82863439 | 82863439 | A | T | SNP | *0* | 0 | 0 | 0 | 0 |
| T02 | 12 | 105840629 | 105840629 | G | A | SNP | *C12orf23* | NM_152261.2 | 5_prime_flanking_region | c.-44396 | NULL |
| T02 | 13 | 43110250 | 43110250 | T | C | SNP | *ENOX1* | NM_017993.1 | intronic | c.1+29354 | e0+29354 |
| T02 | 13 | 46974711 | 46974711 | G | A | SNP | *ENSG00000222527* | ENST00000410595 | 5_prime_flanking_region | c.-43341 | NULL |
| T02 | 13 | 51792815 | 51792815 | G | C | SNP | *LOC644623* | XR_042296.1 | intronic | c.NULL | NULL |
| T02 | 13 | 53641621 | 53641621 | C | G | SNP | *0* | 0 | 0 | 0 | 0 |
| T02 | 13 | 67420580 | 67420580 | G | A | SNP | *ENSG00000217316* | ENST00000403455 | 3_prime_flanking_region | c.*45205 | NULL |
| T02 | 13 | 69394420 | 69394420 | G | A | SNP | *KLHL1* | NM_020866.2 | intronic | c.1014+17753 | e4+17753 |
| T02 | 13 | 81105081 | 81105081 | T | C | SNP | *0* | 0 | 0 | 0 | 0 |
| T02 | 13 | 88242860 | 88242860 | G | A | SNP | *0* | 0 | 0 | 0 | 0 |
| T02 | 13 | 104640097 | 104640097 | A | T | SNP | *0* | 0 | 0 | 0 | 0 |
| T02 | 14 | 29084164 | 29084164 | A | G | SNP | *PRKD1* | NM_002742.2 | 3_prime_flanking_region | c.*32031 | NULL |
| T02 | 14 | 43446188 | 43446188 | C | G | SNP | *0* | 0 | 0 | 0 | 0 |
| T02 | 14 | 48741743 | 48741743 | G | A | SNP | *0* | 0 | 0 | 0 | 0 |
| T02 | 14 | 65208305 | 65208305 | T | C | SNP | *FUT8* | NM_178154.3 | intronic | c.835+2354 | e5+2354 |
| T02 | 14 | 70810305 | 70810305 | C | T | SNP | *C14orf56* | XM_001718387.1 | intronic | c.471+6330 | e3+6330 |
| T02 | 14 | 95003614 | 95003614 | G | A | SNP | *C14orf49* | NM_152592.3 | intronic | c.317+271 | e2+271 |
| T02 | 15 | 30889250 | 30889250 | T | A | SNP | *FMN1* | NM_001103184.1 | intronic | c.3260-5425 | e14-5425 |
| T02 | 15 | 34195342 | 34195342 | T | A | SNP | *0* | 0 | 0 | 0 | 0 |
| T02 | 15 | 34962338 | 34962338 | G | A | SNP | *MEIS2* | NM_170675.2 | 3_prime_flanking_region | c.*9328 | NULL |
| T02 | 15 | 38970458 | 38970458 | C | T | SNP | *VPS18* | NM_020857.2 | 5_prime_flanking_region | c.-3801 | NULL |
| T02 | 15 | 57301874 | 57301874 | A | T | SNP | *MYO1E* | NM_004998.2 | intronic | c.910+676 | e9+676 |
| T02 | 16 | 12244492 | 12244492 | G | A | SNP | *SNX29* | NM_001080530.2 | intronic | c.524-34799 | e7-34799 |
| T02 | 16 | 12977420 | 12977420 | T | C | SNP | *0* | 0 | 0 | 0 | 0 |
| T02 | 16 | 17829043 | 17829043 | A | T | SNP | *0* | 0 | 0 | 0 | 0 |
| T02 | 16 | 50571950 | 50571950 | A | G | SNP | *LOC388276* | XR_041360.1 | 3_prime_flanking_region | c.*45815 | NULL |
| T02 | 16 | 57717753 | 57717753 | G | A | SNP | *0* | 0 | 0 | 0 | 0 |
| T02 | 16 | 86062114 | 86062114 | C | A | SNP | *ZCCHC14* | NM_015144.2 | intronic | c.160-10876 | e2-10876 |
| T02 | 17 | 48184882 | 48184882 | C | T | SNP | *0* | 0 | 0 | 0 | 0 |
| T02 | 18 | 29115196 | 29115196 | C | T | SNP | *C18orf34* | NM_001105528.1 | intronic | c.1176+11925 | e10+11925 |
| T02 | 18 | 37674820 | 37674820 | G | A | SNP | *ENSG00000218954* | ENST00000404042 | 3_prime_flanking_region | c.*21436 | NULL |
| T02 | 18 | 69056323 | 69056323 | G | A | SNP | *0* | 0 | 0 | 0 | 0 |
| T02 | 19 | 5389488 | 5389488 | C | T | SNP | *ZNRF4* | NM_181710.3 | 5_prime_flanking_region | c.-17015 | NULL |
| T02 | 20 | 31959049 | 31959049 | G | A | SNP | *ENSG00000214200* | ENST00000397772 | 3_prime_flanking_region | c.*4760 | NULL |
| T02 | 20 | 34569018 | 34569018 | G | A | SNP | *DLGAP4* | NM_014902.1 | intronic | c.2503+6590 | e8+6590 |
| T02 | 21 | 35993862 | 35993862 | C | T | SNP | *MIRN802* | ENST00000390235 | 5_prime_flanking_region | c.-21021 | NULL |
| T02 | 21 | 42266472 | 42266472 | C | T | SNP | *C2CD2* | NM_015500.1 | 5_prime_flanking_region | c.-19646 | NULL |
| T02 | 22 | 24285731 | 24285731 | C | T | SNP | *ADRBK2* | NM_005160.3 | 5_prime_flanking_region | c.-5277 | NULL |
| T02 | X | 6223552 | 6223552 | A | G | SNP | *LOC100130886* | XM_001714477.1 | 3_prime_flanking_region | c.*39785 | NULL |
| T02 | X | 8227129 | 8227129 | A | T | SNP | *0* | 0 | 0 | 0 | 0 |
| T02 | X | 9675504 | 9675504 | C | A | SNP | *GPR143* | NM_000273.1 | intronic | c.608+1110 | e4+1110 |
| T02 | X | 27563594 | 27563594 | C | A | SNP | *uc004dbv.1* | ENST00000359110 | 3_prime_flanking_region | c.*1761 | NULL |
| T02 | X | 34123294 | 34123294 | G | A | SNP | *ENSG00000210653* | ENST00000387918 | 5_prime_flanking_region | c.-20702 | NULL |
| T02 | X | 100875413 | 100875413 | G | A | SNP | *ENSG00000219756* | ENST00000402659 | 5_prime_flanking_region | c.-12075 | NULL |
| T02 | X | 107259267 | 107259267 | T | C | SNP | *ATG4A* | NM_052936.2 | intronic | c.193+529 | e3+529 |
| T02 | X | 117999792 | 117999792 | C | T | SNP | *LONRF3* | NM_001031855.1 | intronic | c.937-1020 | e3-1020 |
| T02 | X | 119464502 | 119464502 | A | G | SNP | *LAMP2* | NM_002294.1 | intronic | c.742-192 | e6-192 |
| T02 | X | 122928163 | 122928163 | G | C | SNP | *STAG2* | NM_001042749.1 | intronic | c.1+5766 | e0+5766 |
| T02 | X | 123742944 | 123742944 | T | C | SNP | *ODZ1* | NM_014253.2 | intronic | c.536-44216 | e4-44216 |
| T02 | X | 154654594 | 154654594 | A | G | SNP | *SPRY3* | NM_005840.1 | intronic | c.1-2028 | e1-2028 |
| T02 | X | 154654953 | 154654953 | C | T | SNP | *SPRY3* | NM_005840.1 | intronic | c.1-1669 | e1-1669 |
| T03 | 1 | 33359957 | 33359957 | T | G | SNP | *TRIM62* | NM_018207.2 | 3_prime_flanking_region | c.*25408 | NULL |
| T03 | 1 | 57063365 | 57063365 | G | A | SNP | *C8A* | NM_000562.2 | 5_prime_flanking_region | c.-29798 | NULL |
| T03 | 1 | 75577919 | 75577919 | A | C | SNP | *SLC44A5* | NM_152697.1 | intronic | c.53-16 | e3-16 |
| T03 | 1 | 94445124 | 94445124 | G | T | SNP | *ARHGAP29* | NM_004815.3 | intronic | c.511-1297 | e5-1297 |
| T03 | 1 | 101347937 | 101347937 | C | T | SNP | *ENSG00000212577* | ENST00000391275 | 5_prime_flanking_region | c.-23360 | NULL |
| T03 | 1 | 216023571 | 216023571 | A | G | SNP | *SPATA17* | NM_138796.2 | intronic | c.872+1284 | e8+1284 |
| T03 | 1 | 241156626 | 241156626 | C | T | SNP | *ENSG00000219834* | ENST00000404928 | 5_prime_flanking_region | c.-48304 | NULL |
| T03 | 10 | 56216443 | 56216443 | G | A | SNP | *PCDH15* | NM_033056.1 | intronic | c.1+14248 | e0+14248 |
| T03 | 10 | 68615920 | 68615920 | T | C | SNP | *CTNNA3* | NM_013266.1 | intronic | c.844-5636 | e6-5636 |
| T03 | 10 | 73413144 | 73413144 | C | T | SNP | *CHST3* | NM_004273.4 | intronic | c.1+18686 | e0+18686 |
| T03 | 10 | 109529178 | 109529178 | A | G | SNP | *0* | 0 | 0 | 0 | 0 |
| T03 | 10 | 122143685 | 122143685 | G | A | SNP | *ENSG00000218859* | ENST00000404559 | 5_prime_flanking_region | c.-40800 | NULL |
| T03 | 11 | 104250872 | 104250872 | A | T | SNP | *LOC643733* | XM_001718827.1 | 3_prime_flanking_region | c.*32648 | NULL |
| T03 | 11 | 129775614 | 129775614 | T | C | SNP | *ENSG00000175773* | ENST00000318117 | intronic | c.148+323 | e4+323 |
| T03 | 12 | 5109966 | 5109966 | A | C | SNP | *0* | 0 | 0 | 0 | 0 |
| T03 | 12 | 33033924 | 33033924 | C | T | SNP | *0* | 0 | 0 | 0 | 0 |
| T03 | 12 | 36751168 | 36751168 | G | A | SNP | *0* | 0 | 0 | 0 | 0 |
| T03 | 12 | 98270828 | 98270828 | A | G | SNP | *ANKS1B* | NM_152788.2 | intronic | c.1756+46712 | e12+46712 |
| T03 | 13 | 22596695 | 22596695 | G | T | SNP | *HMGA1L6* | ENST00000404463 | 5_prime_flanking_region | c.-9618 | NULL |
| T03 | 13 | 81569267 | 81569267 | C | T | SNP | *0* | 0 | 0 | 0 | 0 |
| T03 | 13 | 86630006 | 86630006 | T | C | SNP | *ENSG00000220931* | ENST00000405599 | 5_prime_flanking_region | c.-39254 | NULL |
| T03 | 13 | 102511414 | 102511414 | G | A | SNP | *SLC10A2* | NM_000452.2 | intronic | c.378-2681 | e2-2681 |
| T03 | 14 | 43636991 | 43636991 | T | A | SNP | *LOC645086* | XM_928125.1 | 3_prime_flanking_region | c.*22295 | NULL |
| T03 | 14 | 82849162 | 82849162 | T | C | SNP | *0* | 0 | 0 | 0 | 0 |
| T03 | 14 | 93748103 | 93748103 | G | T | SNP | *PPP4R4* | NM_058237.2 | intronic | c.294+3447 | e3+3447 |
| T03 | 14 | 100663083 | 100663083 | C | T | SNP | *LOC731724* | XM_001726528.1 | 3_prime_flanking_region | c.*4007 | NULL |
| T03 | 15 | 52380512 | 52380512 | T | A | SNP | *UNC13C* | NM_001080534.1 | intronic | c.4268+649 | e12+649 |
| T03 | 16 | 47440179 | 47440179 | C | G | SNP | *0* | 0 | 0 | 0 | 0 |
| T03 | 18 | 49234793 | 49234793 | G | A | SNP | *DCC* | NM_005215.2 | intronic | c.3392+3763 | e23+3763 |
| T03 | 18 | 69391801 | 69391801 | C | T | SNP | *0* | 0 | 0 | 0 | 0 |
| T03 | 2 | 53289069 | 53289069 | A | G | SNP | *0* | 0 | 0 | 0 | 0 |
| T03 | 2 | 154693473 | 154693473 | T | C | SNP | *GALNT13* | NM_052917.2 | intronic | c.143-11623 | e2-11623 |
| T03 | 2 | 160092440 | 160092440 | A | G | SNP | *BAZ2B* | NM_013450.2 | intronic | c.1+28140 | e0+28140 |
| T03 | 2 | 173168717 | 173168717 | G | A | SNP | *PDK1* | NM_002610.3 | intronic | c.1171-86 | e11-86 |
| T03 | 20 | 8071013 | 8071013 | G | T | SNP | *PLCB1* | NM_015192.2 | intronic | c.100-7928 | e2-7928 |
| T03 | 20 | 14622221 | 14622221 | C | T | SNP | *MACROD2* | NM_080676.1 | intronic | c.418+8616 | e5+8616 |
| T03 | 20 | 22910978 | 22910978 | G | A | SNP | *ENSG00000218697* | ENST00000406887 | 5_prime_flanking_region | c.-16278 | NULL |
| T03 | 20 | 23696835 | 23696835 | G | A | SNP | *CST1* | NM_001898.2 | 5_prime_flanking_region | c.-17332 | NULL |
| T03 | 20 | 25069416 | 25069416 | G | T | SNP | *ENSG00000216300* | ENST00000405476 | 3_prime_flanking_region | c.*20387 | NULL |
| T03 | 20 | 30690812 | 30690812 | C | T | SNP | *ENSG00000198547* | ENST00000360785 | intronic | c.585+1217 | e2+1217 |
| T03 | 21 | 24904890 | 24904890 | C | T | SNP | *0* | 0 | 0 | 0 | 0 |
| T03 | 22 | 14481955 | 14481955 | A | G | SNP | *ENSG00000218784* | ENST00000405433 | intronic | c.NULL | NULL |
| T03 | 3 | 22302551 | 22302551 | A | C | SNP | *0* | 0 | 0 | 0 | 0 |
| T03 | 3 | 136335729 | 136335729 | A | C | SNP | *EPHB1* | NM_004441.3 | intronic | c.1297+1148 | e5+1148 |
| T03 | 4 | 734587 | 734587 | A | T | SNP | *PCGF3* | NM_006315.4 | intronic | c.462+6111 | e5+6111 |
| T03 | 4 | 30258141 | 30258141 | C | T | SNP | *0* | 0 | 0 | 0 | 0 |
| T03 | 4 | 32128504 | 32128504 | A | G | SNP | *0* | 0 | 0 | 0 | 0 |
| T03 | 4 | 107305077 | 107305077 | T | A | SNP | *TBCKL* | NM_033115.2 | intronic | c.2046+6624 | e20+6624 |
| T03 | 4 | 111557921 | 111557921 | C | T | SNP | *ENSG00000199894* | ENST00000363024 | 3_prime_flanking_region | c.*15793 | NULL |
| T03 | 4 | 128263675 | 128263675 | C | T | SNP | *0* | 0 | 0 | 0 | 0 |
| T03 | 4 | 163986400 | 163986400 | G | A | SNP | *0* | 0 | 0 | 0 | 0 |
| T03 | 5 | 23207009 | 23207009 | G | A | SNP | *0* | 0 | 0 | 0 | 0 |
| T03 | 5 | 25958192 | 25958192 | T | A | SNP | *LOC100133558* | XM_001716419.1 | 5_prime_flanking_region | c.-639 | NULL |
| T03 | 5 | 35220883 | 35220883 | C | T | SNP | *PRLR* | NM_000949.4 | intronic | c.1+45244 | e0+45244 |
| T03 | 5 | 49741442 | 49741442 | C | T | SNP | *EMB* | NM_198449.2 | intronic | c.472+1026 | e4+1026 |
| T03 | 5 | 73904029 | 73904029 | T | G | SNP | *0* | 0 | 0 | 0 | 0 |
| T03 | 5 | 124179844 | 124179844 | C | T | SNP | *ENSG00000214748* | ENST00000398900 | 5_prime_flanking_region | c.-7021 | NULL |
| T03 | 5 | 155388389 | 155388389 | G | A | SNP | *0* | 0 | 0 | 0 | 0 |
| T03 | 5 | 166470369 | 166470369 | A | G | SNP | *0* | 0 | 0 | 0 | 0 |
| T03 | 6 | 137096 | 137096 | C | T | SNP | *LOC100133661* | XM_001713857.1 | intronic | c.100+3752 | e1+3752 |
| T03 | 6 | 21097640 | 21097640 | A | G | SNP | *CDKAL1* | NM_017774.2 | intronic | c.910-10797 | e9-10797 |
| T03 | 6 | 51288646 | 51288646 | C | A | SNP | *0* | 0 | 0 | 0 | 0 |
| T03 | 6 | 53263845 | 53263845 | C | T | SNP | *ELOVL5* | NM_021814.3 | intronic | c.246+688 | e2+688 |
| T03 | 6 | 156546129 | 156546129 | C | G | SNP | *0* | 0 | 0 | 0 | 0 |
| T03 | 7 | 123916649 | 123916649 | T | A | SNP | *LOC136157* | NM_001085395.2 | 3_prime_flanking_region | c.*12404 | NULL |
| T03 | 7 | 141156948 | 141156948 | A | G | SNP | *ENSG00000208329* | ENST00000385594 | 5_prime_flanking_region | c.-5640 | NULL |
| T03 | 9 | 92692480 | 92692480 | G | A | SNP | *SYK* | NM_003177.1 | intronic | c.1835+1750 | e12+1750 |
| T03 | 9 | 101378802 | 101378802 | C | T | SNP | *0* | 0 | 0 | 0 | 0 |
| T03 | X | 3209504 | 3209504 | C | T | SNP | *LOC100129464* | XM_001715710.1 | intronic | c.514-2692 | e6-2692 |
| T03 | X | 65252033 | 65252033 | C | G | SNP | *HEPH* | NM_014799.1 | 5_prime_flanking_region | c.-73069 | NULL |
| T03 | X | 104466882 | 104466882 | G | A | SNP | *IL1RAPL2* | NM_017416.1 | intronic | c.697+68002 | e4+68002 |
| T03 | X | 112625072 | 112625072 | G | A | SNP | *ENSG00000220541* | ENST00000403700 | 5_prime_flanking_region | c.-27317 | NULL |
| T03 | X | 126331912 | 126331912 | G | T | SNP | *ENSG00000218083* | ENST00000404952 | 5_prime_flanking_region | c.-20093 | NULL |
| T03 | X | 131622429 | 131622429 | A | C | SNP | *HS6ST2* | ENST00000319809 | intronic | c.1061+8393 | e6+8393 |

High confidence somatic mutations following visual inspection in T01, T02, and T03 tumor are shown.
